# Supplementary material for: Targeting Dendritic Cell Dysfunction to Circumvent Anti-PD1 Resistance in Head and Neck Cancer
Source: PubMed Central journal article supplement — Clin Cancer Res. 2024 Feb 19;30(9):1934–44. doi: 10.1158/1078-0432.CCR-23-3477 (PMC11061605; doi:10.1158/1078-0432.ccr-23-3477), 2024-02-19
Supplement: ccr-23-3477_supplementary_figure_s1_suppfs1.pdf [file ccr-23-3477_supplementary_figure_s1_suppfs1.pdf]

# Figure S1

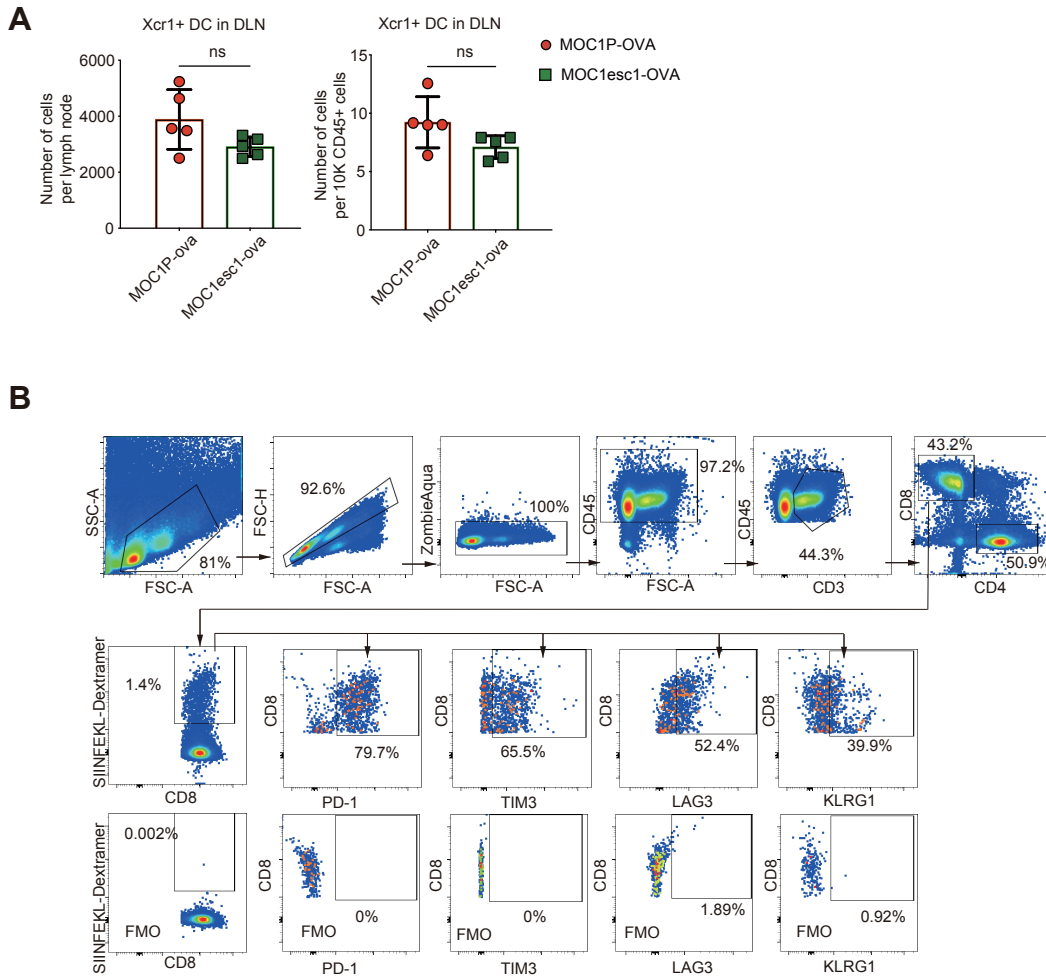

**Figure S1**

**A.** Xcr1+ DCs in DLNs of MOC1P-ova/MOC1esc1-ova harvested 10 days post inoculation were analyzed by flow cytometry. Total number of cells per LN and number of cells per 10,000 CD45+ cells are shown. (n=5, representative data of two independent experiments.)

**B.** Representative gating strategies for Figure 1B, C.

Individual data and mean  $\pm$  SD are plotted in Figure S1A. Data were analyzed using the Mann-Whitney U Test to generate two-tailed P values in Figure S1A.
