# Supplementary material for: Targeting Dendritic Cell Dysfunction to Circumvent Anti-PD1 Resistance in Head and Neck Cancer
Source: PubMed Central journal article supplement — Clin Cancer Res. 2024 Feb 19;30(9):1934–44. doi: 10.1158/1078-0432.CCR-23-3477 (PMC11061605; doi:10.1158/1078-0432.ccr-23-3477), 2024-02-19
Supplement: ccr-23-3477_supplementary_figure_s3_suppfs3.pdf [file ccr-23-3477_supplementary_figure_s3_suppfs3.pdf]

# Figure S3

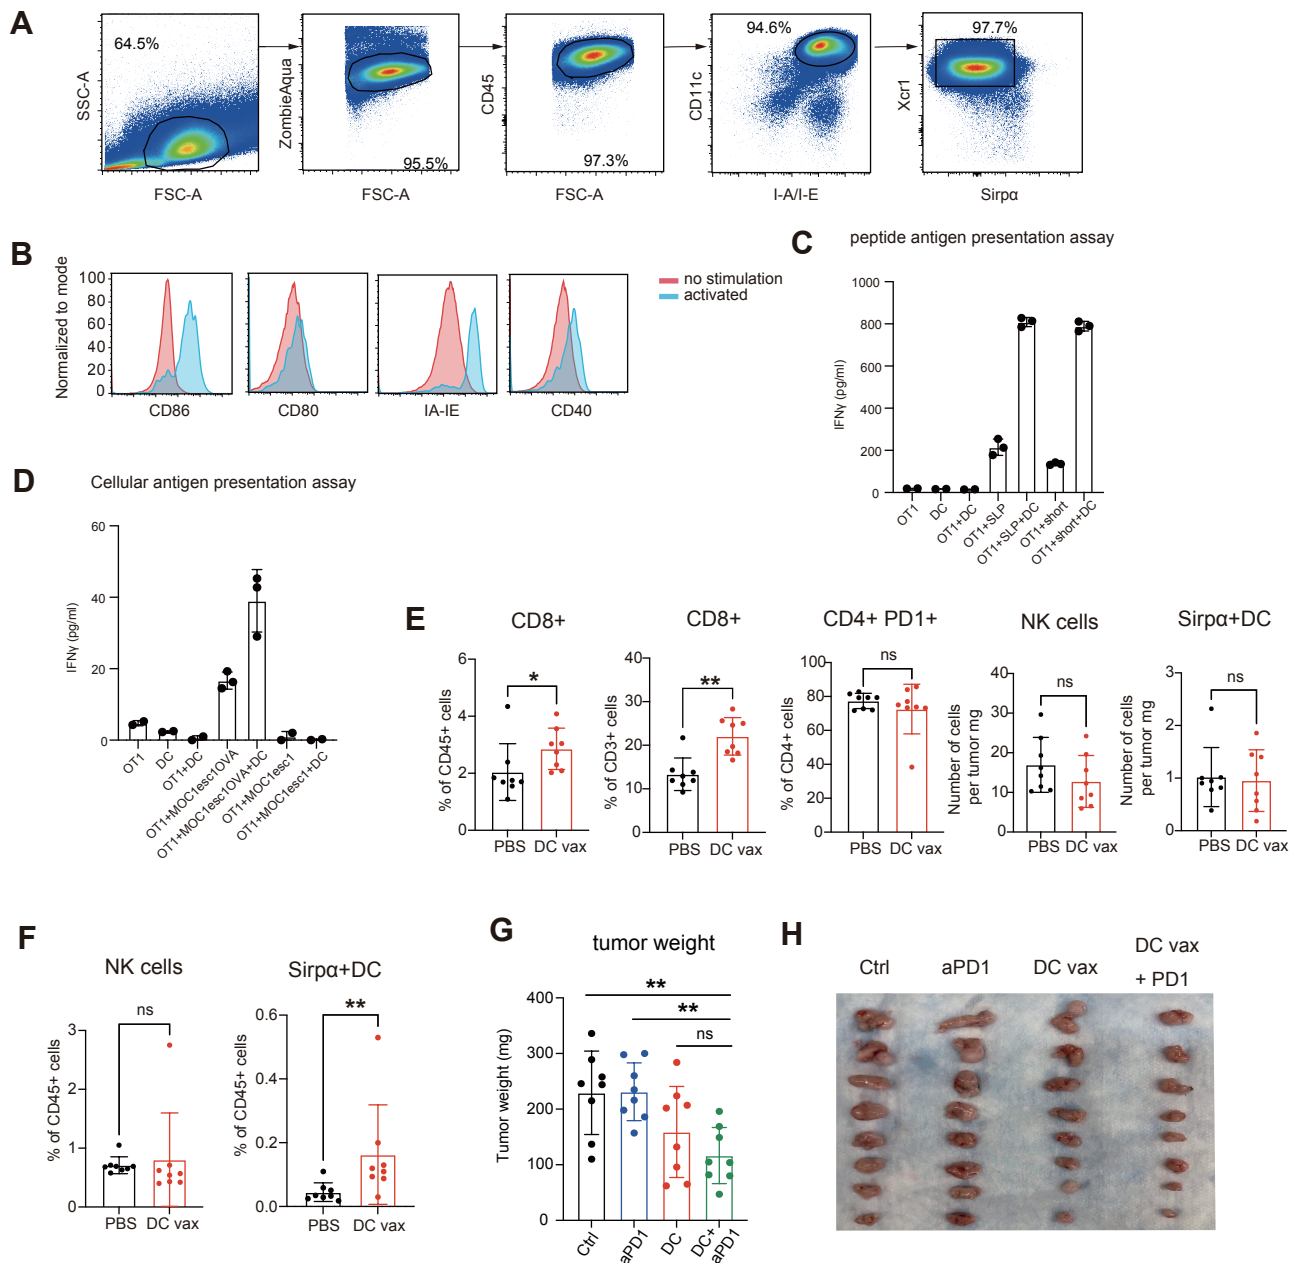

**Figure S3**

**A.** Representative flow cytometry results of isolated Xcr1+ cDC1s used for DC vaccine experiments.

**B.** Histogram of indicated marker expression gated on Xcr1+ cDC1s analyzed by flow cytometry. Xcr1+ cDCs were isolated and cultured with (=activated) or without (=no stimulation) PolyI:C (20 µg/ml) for 4 hours before staining.

**C, D.** IFN-γ ELISA testing the ability of Xcr1+ DCs to activate CD8+ T cells. CD8+ cells isolated from OT-1 mouse splenocyte (OT1) were co-cultured with Xcr1+ cDC1s (DC), with or without stimulation of ovalbumin short peptide (short), ovalbumin synthetic long peptide (SLP) in Figure S3C and MOC1esc1-OVA (full length) cell lysate (MOC1esc1OVA) in Figure S3D. n=2-3.

**E, F.** Flow cytometric analysis of MOC1esc1 tumors (E) and DLNs (F) treated with intra-tumoral PBS or DC vaccine on days 1/4/7 post inoculation, and harvested on day 14 post tumor inoculation. (n=8, representative data of two independent experiments.)

**G.** Tumor weight measured on last day of experiment in Figure 3E.

**H.** Photo of tumors harvested in experiment shown in Figure 3E.

Individual data with mean ± SD are plotted in Figures S3C-G. Data were analyzed using the Mann-Whitney U Test to generate two-tailed P values in Figure S3E, F, and One-way ANOVA followed by Dunnett's multiple comparison was used for Figure S3G.
