# Supplementary material for: Targeting Dendritic Cell Dysfunction to Circumvent Anti-PD1 Resistance in Head and Neck Cancer
Source: PubMed Central journal article supplement — Clin Cancer Res. 2024 Feb 19;30(9):1934–44. doi: 10.1158/1078-0432.CCR-23-3477 (PMC11061605; doi:10.1158/1078-0432.ccr-23-3477), 2024-02-19
Supplement: ccr-23-3477_supplementary_figure_s4_suppfs4.pdf [file ccr-23-3477_supplementary_figure_s4_suppfs4.pdf]

# Figure S4

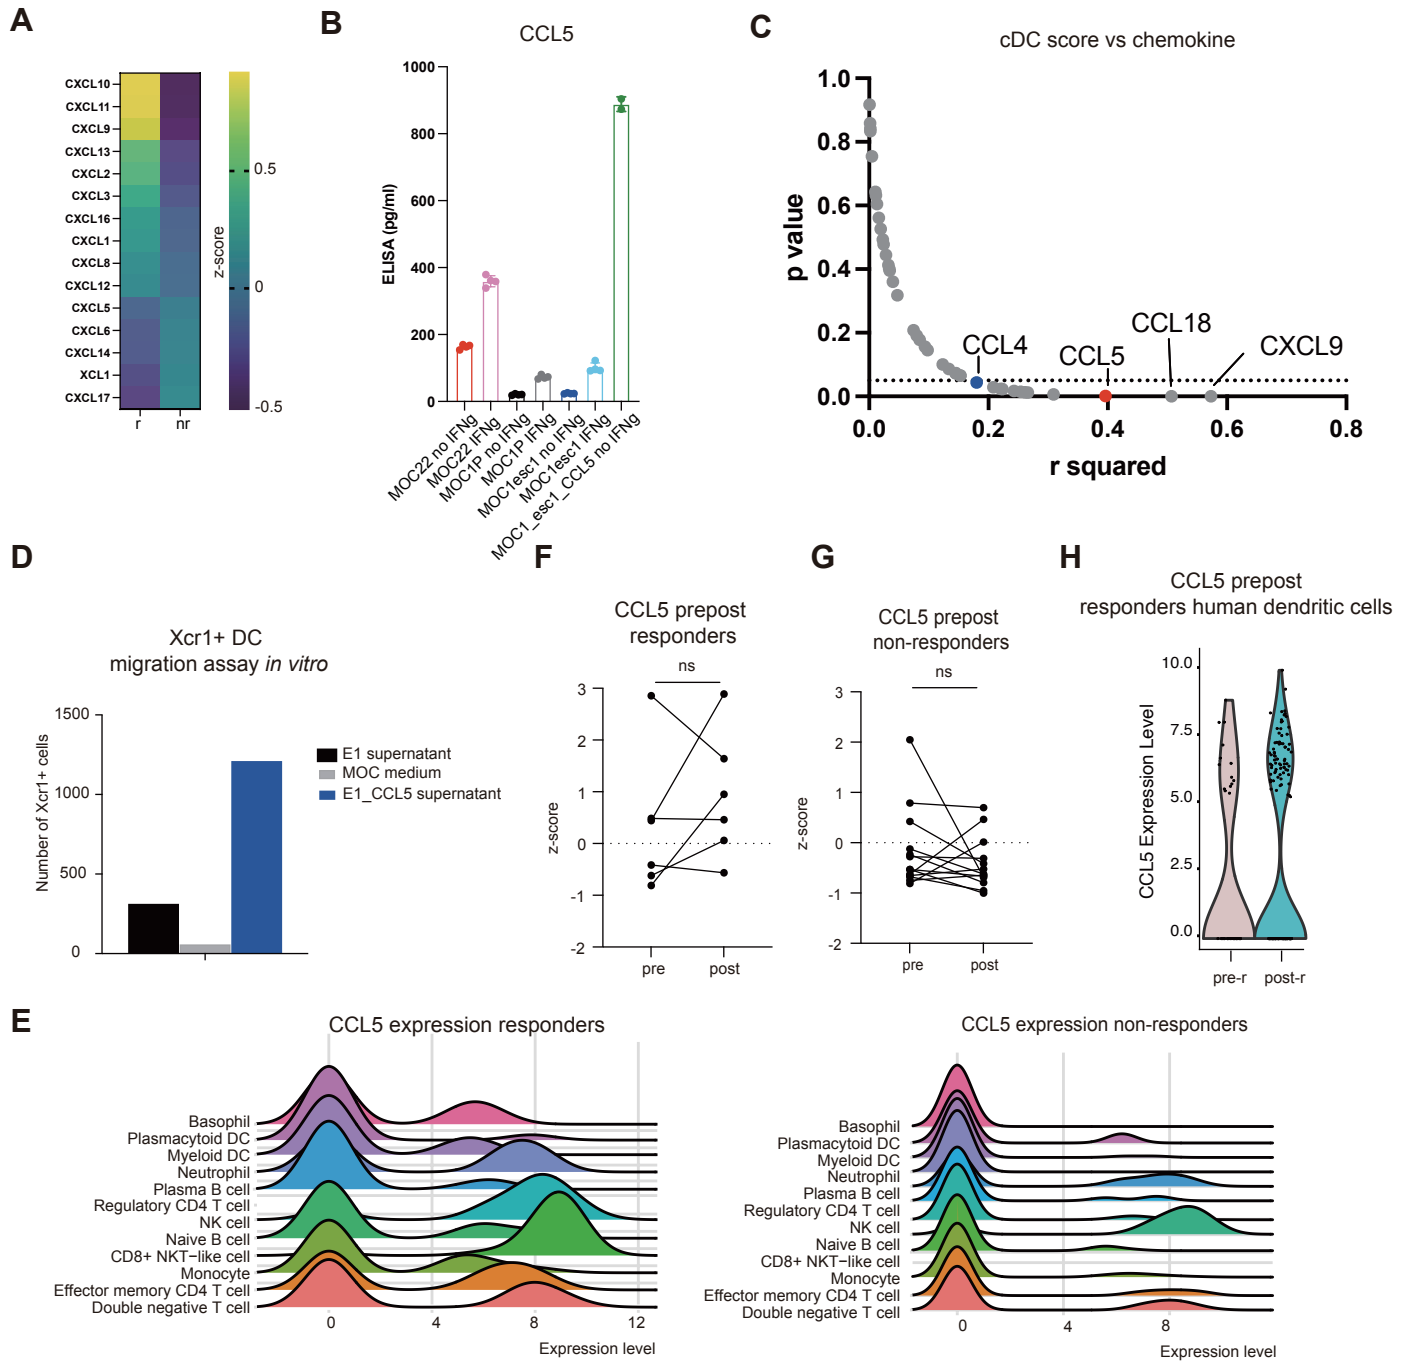

**Figure S4.**

**A.** Heatmap of CXC chemokines ligands (CXCL) based on pretreatment bulk RNA-seq data between responders and non-responders.

**B.** CCL5 expression in each MOC model cultured media with or without IFN- $\gamma$  stimulation (100U/ml for 48 hours) were analyzed by CCL5-ELISA. n=2-3.

**C.** p value and r squared value calculated from Pearson correlation coefficient of cDC score and chemokine RNA expression are plotted. Broken line represents a p value of 0.05.

**D.** Number of Xcr1+ DCs migrated using the migration assay described in Methods.

**E.** Distribution plots showing cumulative expression levels of CCL5 in various immune subtypes other than CD8+ T cells, based on scRNA-seq of HNSCC patients prior to pembrolizumab. Left panel responders, right panel non-responders.

**F, G.** Comparison of CCL5 expression in bulk RNA-seq data from pre and post treatment samples in responders (F) and non-responders (G), shown as z-score. n=6.

**H.** Violin plot showing CCL5 expression level in human dendritic cells between responders pre- and post-treatment based on scRNA-seq data.

Individual data and mean are plotted in Figure S4B, D. Data were analyzed using the Mann-Whitney U Test to generate two-tailed P values in Figure S4F, G.
